# Supplementary material for: Co-electrodeposited Cu2ZnSnS4 thin-film solar cells with over 7% efficiency fabricated via fine-tuning of the Zn content in absorber layers
Source: Royal Society of Chemistry journal article supplement (doi:10.1039/c5ta09636g), 2016-01-01
Supplement: c5ta09636g1.pdf [file c5ta09636g1.pdf]

## Electronic Supplementary Information for:

### **Co-electrodeposited Cu<sub>2</sub>ZnSnS<sub>4</sub> thin-film solar cells with over 7% efficiency fabricated via fine-tuning of the Zn content in absorber layers**

Jiahua Tao,<sup>a</sup> Leilei Chen,<sup>a</sup> Huiyi Cao,<sup>a</sup> Chuanjun Zhang,<sup>b</sup> Junfeng Liu,<sup>a</sup> Yingbin Zhang,<sup>a</sup> Ling Huang,<sup>a</sup> Jinchun Jiang,<sup>a</sup> Pingxiong Yang<sup>a</sup> and Junhao Chu<sup>ab\*</sup>

<sup>a</sup> Key Laboratory of Polar Materials and Devices (MOE), Department of Electronic Engineering, East China Normal University, Shanghai 200241, China

<sup>b</sup> National Laboratory for Infrared Physics, Shanghai Institute of Technical Physics, Chinese Academy of Sciences, Shanghai 200083, China

\*Corresponding author. E-mail: jhchu@mail.sitp.ac.cn (JH. Chu).

## **Experimental**

### **CdS thin films preparation**

The CdS buffer layers were prepared in a radio frequency (RF) magnetron sputtering system. A sintered ceramic CdS target (99.999% purity, 2 inches diameter) was employed as source material. The separation between target and substrate was about 6 cm in the on-axis geometry. The base pressure of the deposition system was  $4 \times 10^{-5}$  Pa and the growth pressure was fixed at 2.7 Pa. The sputtering power was fixed at 30 W. The deposition was carried out in pure argon gas (99.999%) at a constant substrate temperature of 200 °C during 25 min after 5 min of pre-sputtering.

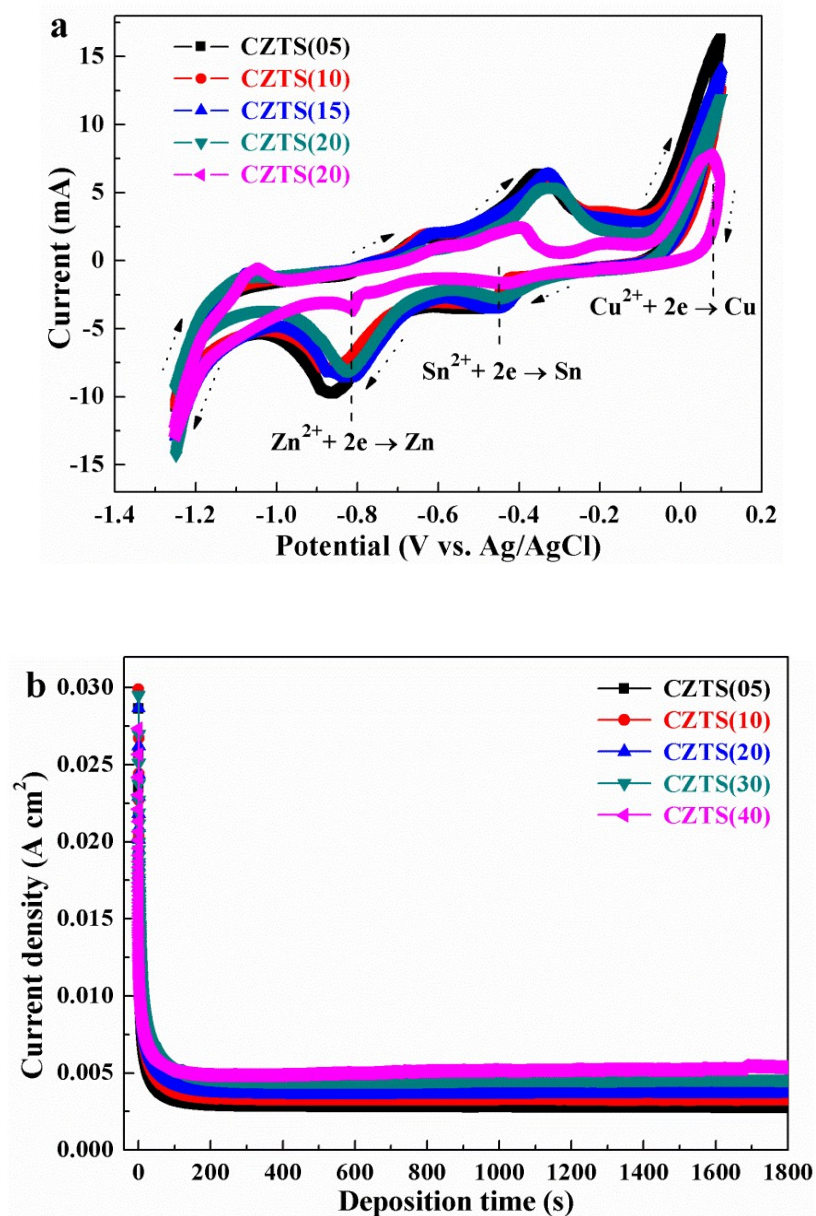

**Figure S1.** (a) Cyclic-voltammetry diagrams of aqueous electrolyte solutions with different Zn(II) concentrations used for co-electroplated Cu–Zn–Sn–S precursors on Mo/glass electrodes, scanned from 0.2 to –1.3 V at a scan rate of 10 mV s<sup>–1</sup>. Arrows indicate scan directions. (b) The corresponding chronoamperograms during co-electrodeposition with constant potential at –1.15 V (vs. Ag/AgCl) for 30 min.

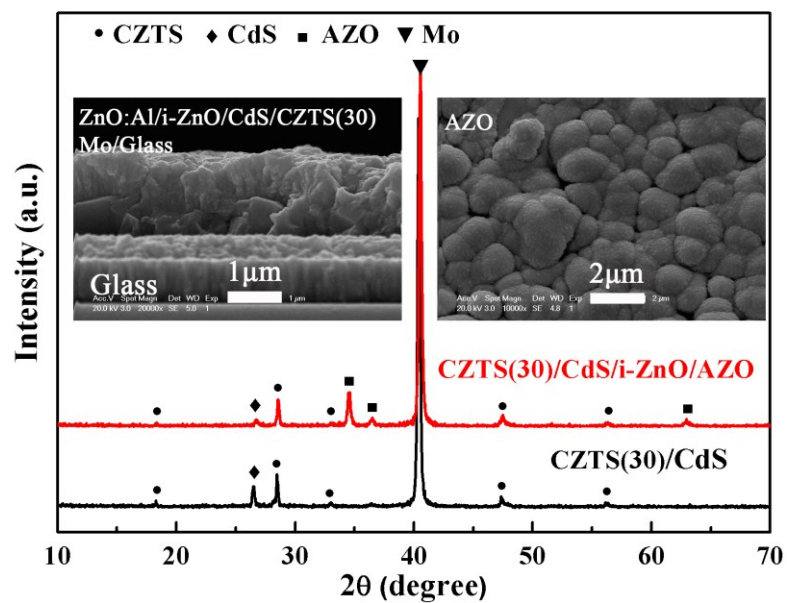

**Figure S2.** XRD pattern of a CdS thin film deposited on the CZTS(30)/Mo/glass substrate and then an AZO film successively deposited on CdS/CZTS(30)/Mo/glass substrate by RF magnetron sputtering. Inset cross-sectional SEM image of the CZTS thin-film solar cell, displaying the device structure of AZO/ZnO/CdS/CZTS/Mo/Glass.

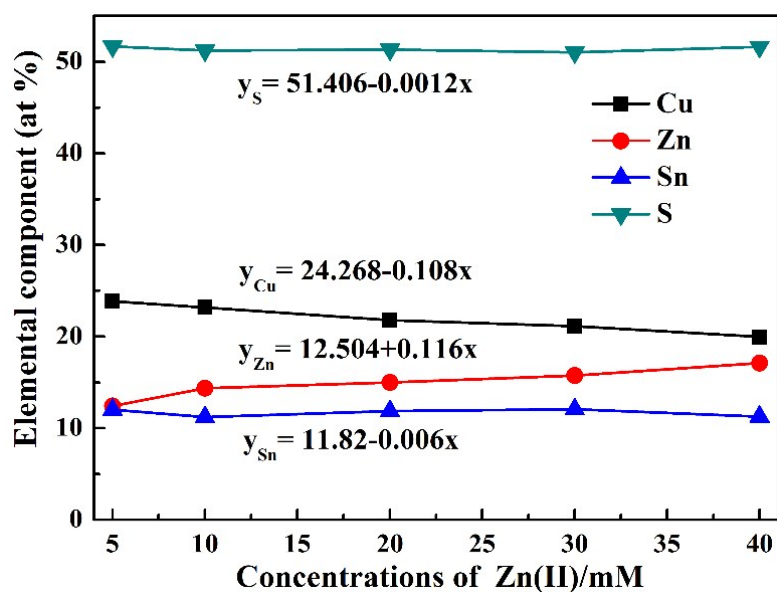

**Figure S3.** Dependence of Cu, Zn, Sn and S content in the sulfurized CZTS thin films as a function of different concentrations of Zn(II) concentrations in the electrolyte solutions.

Table S1. Chemical compositions of the precursor films as a function of the concentration of Zn(II) in electrolyte solutions.

| Sample ID | Elemental component (at %) |       |       |       | Composition ratio |       |         |
|-----------|----------------------------|-------|-------|-------|-------------------|-------|---------|
|           | Cu                         | Zn    | Sn    | S     | Cu/(Zn+Sn)        | Zn/Sn | S/Metal |
| CZTS(05)  | 39.76                      | 21.91 | 21.87 | 16.46 | 0.91              | 1.00  | 0.20    |
| CZTS(10)  | 39.01                      | 23.27 | 21.57 | 16.15 | 0.87              | 1.08  | 0.19    |
| CZTS(20)  | 38.89                      | 23.94 | 21.06 | 16.11 | 0.86              | 1.14  | 0.19    |
| CZTS(30)  | 38.21                      | 24.51 | 21.25 | 16.03 | 0.84              | 1.15  | 0.19    |
| CZTS(40)  | 38.07                      | 24.98 | 20.69 | 16.26 | 0.83              | 1.21  | 0.19    |

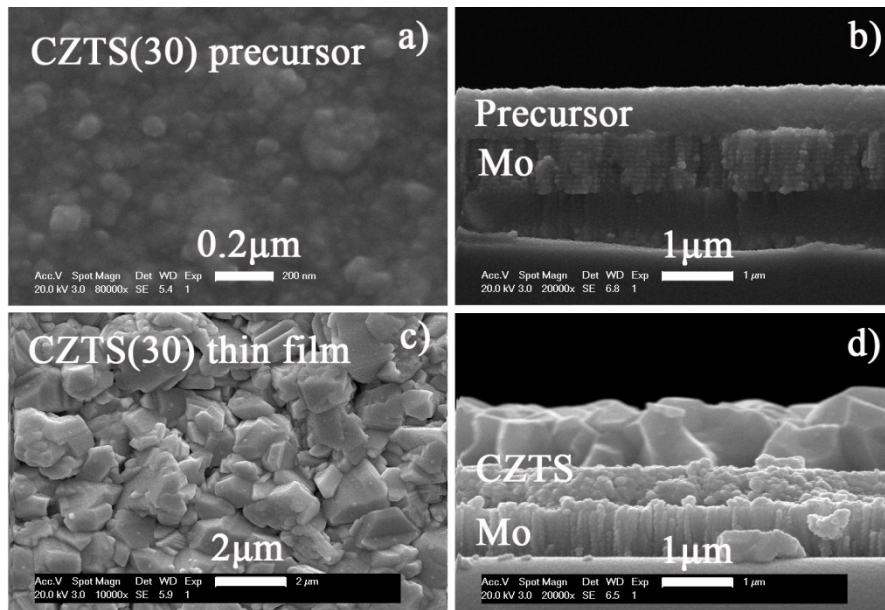

**Figure S4.** Surface and cross-sectional SEM images of (a and b) CZTS(30) precursor and (c and d) CZTS(30) thin film.

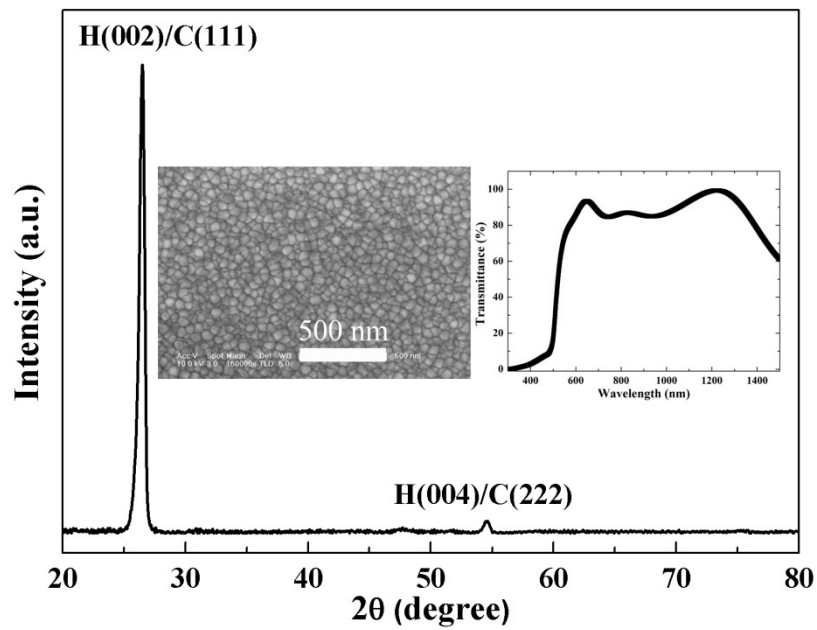

**Figure S5.** The XRD spectra of the sputtered CdS thin film deposited on a glass substrate. Inset SEM image and optical transmittance spectra of the sputtered CdS thin film on a glass substrate, respectively.

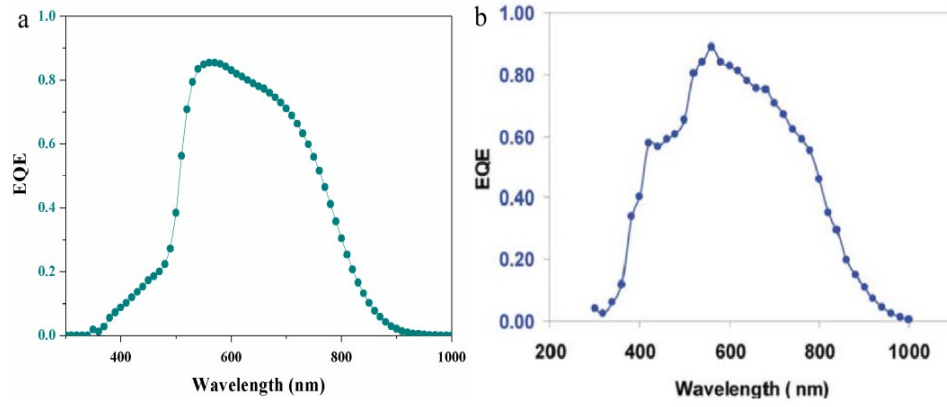

**Figure S6.** EQE measurements of the CZTS solar cells; (a) this work (CZTS(30) solar cell, PCE=7.23%,  $J_{sc}$ =19.2 mA cm<sup>-2</sup>) and (b) Ref (PCE=7.3%,  $J_{sc}$ =22 mA cm<sup>-2</sup>).<sup>1</sup>

- 1 S. Ahmed, K.B. Reuter, O. Gunawan, L. Guo, L.T. Romankiw and H. Deligianni, Adv. Energy Mater., 2012, 2, 253–259.

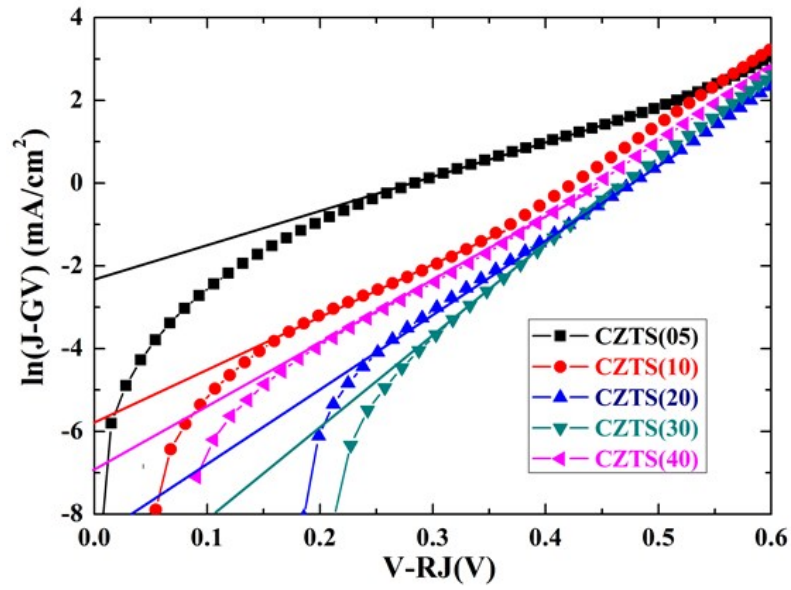

**Figure S7**  $\ln(J-GV)$  versus  $V-RJ$  with fit used to determine the reverse saturation current density ( $J_0$ ) for CZTS solar cells.
